# Supplementary material for: Non-Invasive Tear Break-Up Detection with the Kowa DR-1α and Its Relationship to Dry Eye Clinical Severity
Source: MDPI journal article supplement (doi:10.3390/ijms232314774), 2022-11-25
Supplement: s1 [file s1]

## Supplementary information

Equation S1: Sample size calculation.

$$n \geq \frac{4z_{\alpha/2}^2 \sigma_0^2}{\delta^2}$$

n: sample size

(1- $\alpha$ ) = 0.95 (95%) (Confidence interval) ( $\alpha=0.05$ )

Z-score ( $\alpha/2$ ) = 1.960

$\delta$ : margin of error ( $\pm\delta/2$ )

$\sigma$ : standard deviation
